# Supplementary material for: Perilipin 5 fine-tunes lipid oxidation to metabolic demand and protects against lipotoxicity in skeletal muscle
Source: PubMed Central journal article supplement (PMC5138838; doi:10.1038/srep38310), 2016-12-06
Supplement: srep38310-s1.pdf [file srep38310-s1.pdf]

## SUPPLEMENTARY INFORMATION

### **Perilipin 5 fine-tunes lipid oxidation to metabolic demand and protects against lipotoxicity in skeletal muscle**

Claire Laurens<sup>1,2</sup>, Virginie Bourlier<sup>1,2</sup>, Aline Mairal<sup>1,2</sup>, Katie Louche<sup>1,2</sup>, Pierre-Marie Badin<sup>1,2</sup>, Etienne Mouisel<sup>1,2</sup>, Alexandra Montagner<sup>2,3</sup>, André Marette<sup>4,6</sup>, Angelo Tremblay<sup>5,6</sup>, John S. Weisnagel<sup>7</sup>, Hervé Guillou<sup>2,3</sup>, Dominique Langin<sup>1,2,8</sup>, Denis R. Joannisse<sup>5,6§</sup>, Cedric Moro<sup>1,2§</sup>

<sup>§</sup> These authors contributed equally to this work.

<sup>1</sup>INSERM, UMR1048, Institute of Metabolic and Cardiovascular Diseases, Toulouse, France

<sup>2</sup>University of Toulouse, Paul Sabatier University, France

<sup>3</sup>INRA, UMR 1331, TOXALIM, Toulouse, France

<sup>4</sup>Department of Medicine, Laval University, Quebec City, Canada

<sup>5</sup>Department of Kinesiology, Laval University, Quebec City, Canada

<sup>6</sup>Centre de Recherche de l'Institut Universitaire de Cardiologie et de Pneumologie de Québec, Laval University, Quebec City, Canada

<sup>7</sup>CHU-CHUQ, Laval University, Quebec City, Canada

<sup>8</sup>Toulouse University Hospitals, Department of Clinical Biochemistry, Toulouse, France

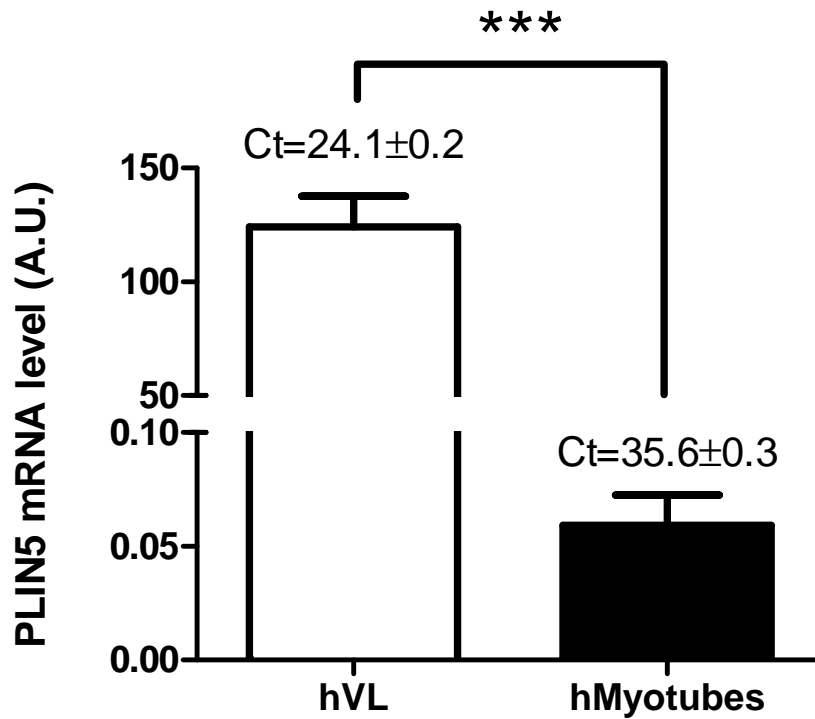

**Supplemental Figure S1.** PLIN5 gene expression in human native skeletal muscle and cultured myotubes. PLIN5 mRNA levels in human *vastus lateralis* muscle biopsy samples and human primary myotubes (n=9). Average Ct ± SEM are shown on the graph. \*\*\*p<0.001 versus hVL.

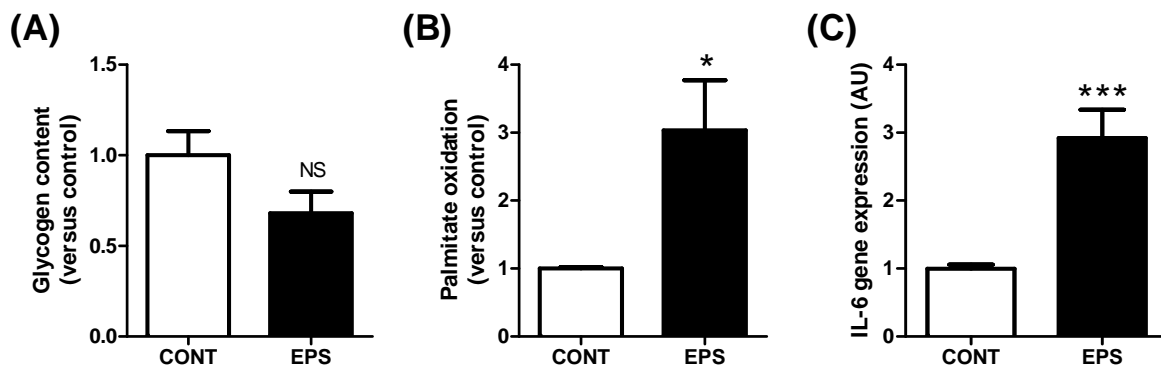

**Supplemental Figure S2.** Validation of the electrical pulse stimulation model in human myotubes. **(A)** Total glycogen content (n=4), **(B)** palmitate oxidation (n=4) and **(C)** interleukin-6 (IL-6) gene expression (n=4) were measured in control (CONT) and electrically stimulated (EPS) myotubes for 24 hours. NS : non-significant, \*p<0.05, \*\*\*p<0.001.

(A)

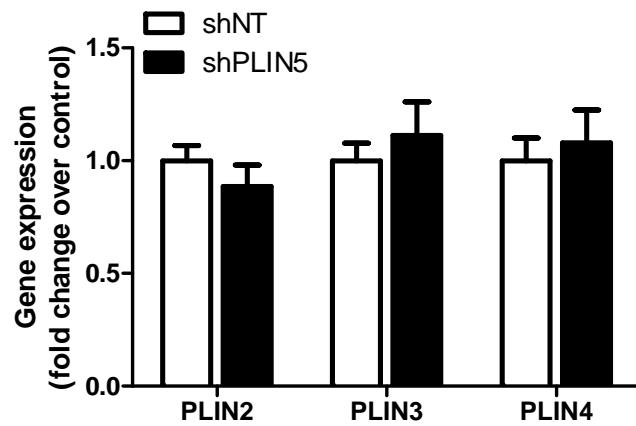

(B)

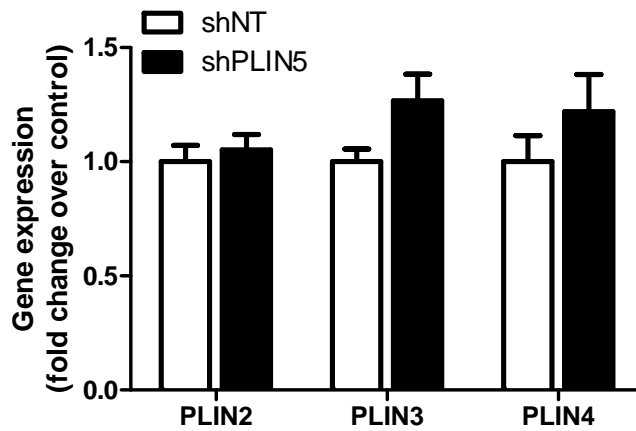

**Supplemental Figure S3.** PLIN5 knockdown does not induce any compensatory changes in other PLIN isoforms. PLIN2, PLIN3 and PLIN4 gene expression in control (shNT) and PLIN5 knocked down (shPLIN5) *tiabialis anterior* muscles, measured in mice fed either (A) normal chow (NCD) or (B) high-fat diets for 12 weeks (n=6).

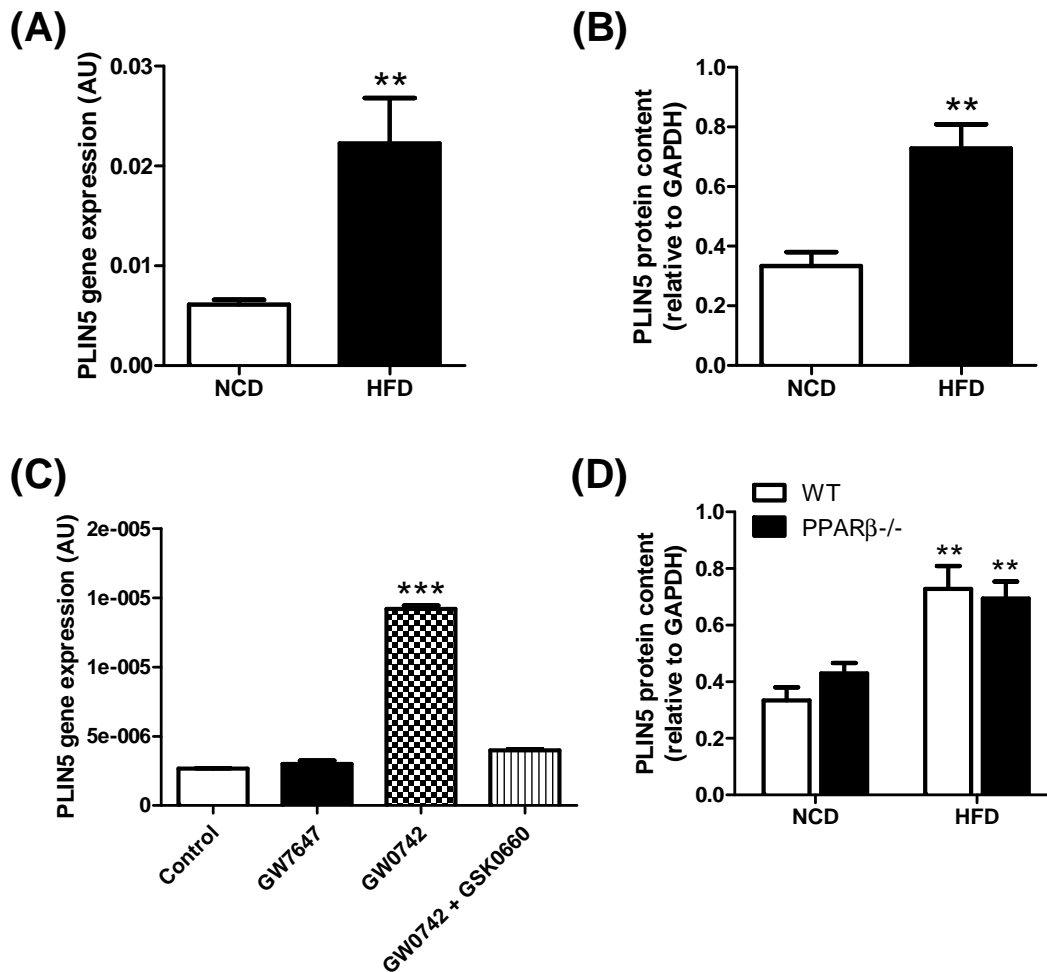

**Supplemental Figure S4.** PLIN5 is induced by high-fat feeding in mouse skeletal muscle independently of PPAR $\beta$  activation. PLIN5 **(A)** gene expression and **(B)** protein content were measured in skeletal muscle of mice fed either normal chow (NCD) or high-fat (HFD) diet for 12 weeks (n=7). **(C)** PLIN5 gene expression was measured in myotubes treated for 24 h in absence (control) or presence of selective PPAR $\alpha$  agonist GW7647 1 nM, PPAR $\beta$  agonist GW0742 1nM and PPAR $\beta$  antagonist GSK0660 500 nM (n=3). **(D)** PLIN5 protein content was measured in skeletal muscle from wild-type (WT) and PPAR $\beta$  knockout (PPAR $\beta$ <sup>-/-</sup>) mice fed either chow (NCD) or high-fat (HFD) diet (n=6). \*\*p<0.01, \*\*\*p<0.001 versus control.
